# Supplementary material for: REEP6 deficiency leads to retinal degeneration through disruption of ER homeostasis and protein trafficking
Source: PubMed Central journal article supplement (PMC5808736; doi:10.1093/hmg/ddx149), 2017-05-05
Supplement: ddx149_supp.pdf [file ddx149_supp.pdf]

## Supplementary Information

### REEP6 Deficiency Leads to Retinal Degeneration through Disruption of ER Homeostasis and Protein Trafficking

Smriti A. Agrawal,<sup>1,2</sup> Thomas Burgoyne,<sup>3</sup> Aiden Eblimit,<sup>1,2</sup> James Bellingham,<sup>3</sup> David A. Parfitt,<sup>3</sup> Amelia Lane,<sup>3</sup> Ralph Nichols,<sup>4</sup> Chinwe Asomugha,<sup>5</sup> Matthew J. Hayes,<sup>3</sup> Peter M. Munro,<sup>3</sup> Mingchu Xu,<sup>1,2</sup> Keqing Wang,<sup>1,2</sup> Clare E. Futter,<sup>3</sup> Yumei Li,<sup>1,2</sup> Rui Chen<sup>1,2\*</sup> and Michael E. Cheetham,<sup>3\*</sup>

<sup>1</sup> Department of Molecular and Human Genetics, Baylor College of Medicine, Houston, TX 77030-3411, USA;

<sup>2</sup> Human Genome Sequencing Center, Baylor College of Medicine, Houston, TX 77030-3411, USA;

<sup>3</sup> UCL Institute of Ophthalmology, 11-43 Bath Street, London EC1V 9EL, UK;

<sup>4</sup> Department of Ophthalmology, Baylor College of Medicine, Houston, TX 77030-3411, USA;

<sup>5</sup> Department of Molecular Physiology and Biophysics, Baylor College of Medicine, Houston, TX 77030-3411, USA;

#### \*Corresponding author information:

Rui Chen, [ruichen@bcm.edu](mailto:ruichen@bcm.edu), Phone: +1- 713-798-5194, Fax: +1- 713-798-5741

Mike Cheetham, [michael.cheetham@ucl.ac.uk](mailto:michael.cheetham@ucl.ac.uk), Phone: +44 20 7608 6944, Fax: +44 20 7608

6892

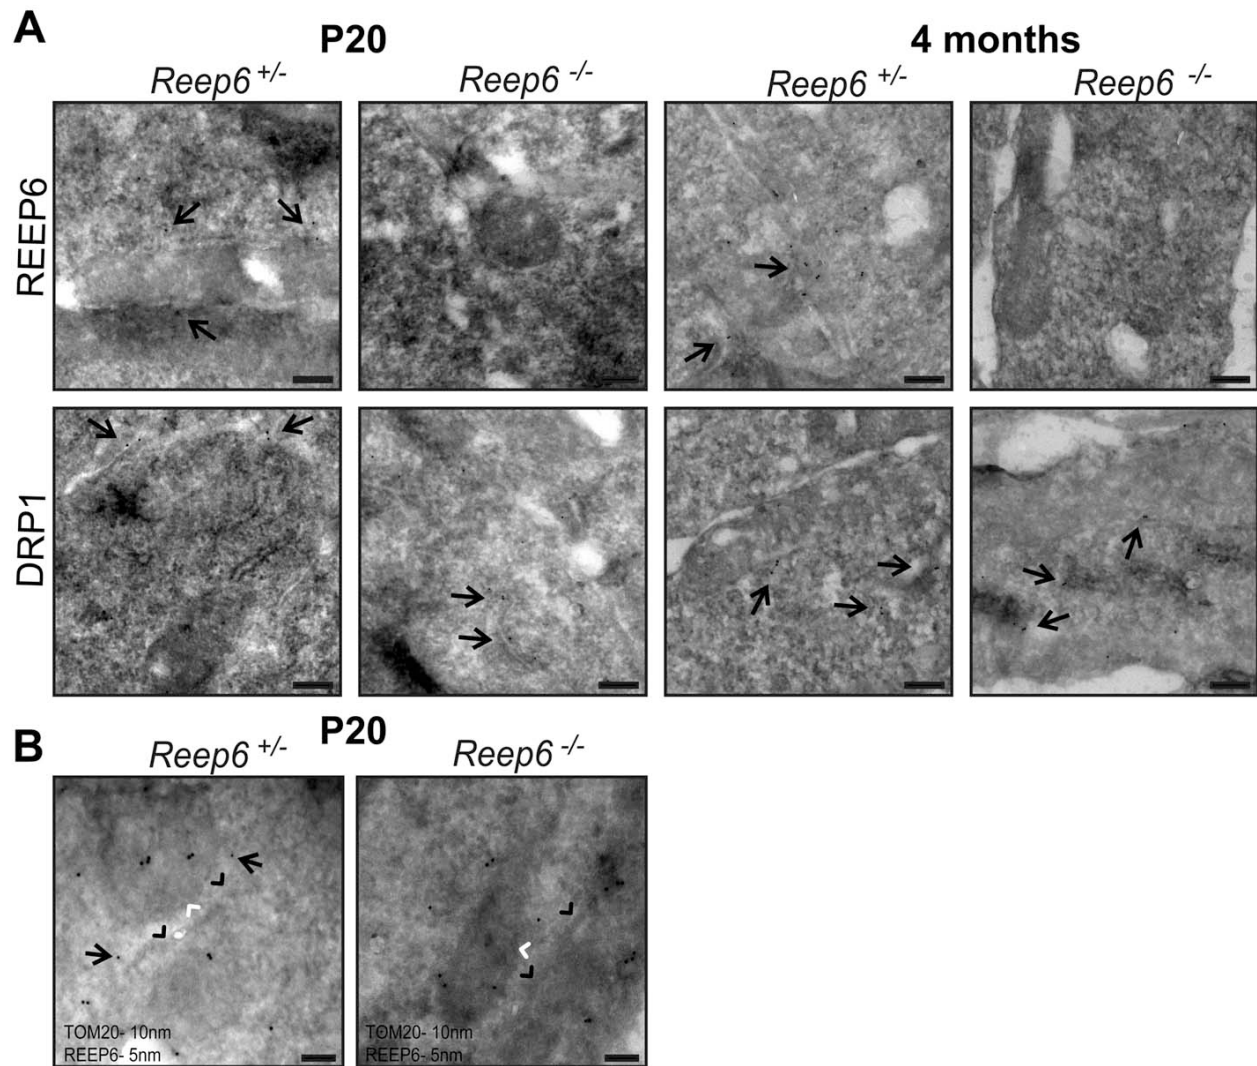

**Supplemental material Fig.1** Immuno-EM labelling of REEP6, Drp1 and Tom20. REEP6 immunoreactivity is detected close to potential ER-mitochondrial contact sites. Immuno-EM using TOM20, a mitochondrial marker and Drp1 (dynamin-related protein 1), a mitochondrial-ER interface marker, shows that REEP6 is expressed near the ER-mitochondrial contact sites. **(A)** Arrows indicate immuno-gold labelling of REEP6 and Drp1. **(B)** Dual immuno-EM labelling of Tom20 (10nm gold) and REEP6 (5nm gold). Arrows highlight REEP6 labelling, black arrow heads ER and white arrow mitochondria at sites of potential mitochondrial-ER interface. Scale bar= **(A)** 200nm, **(B)** 100nm.

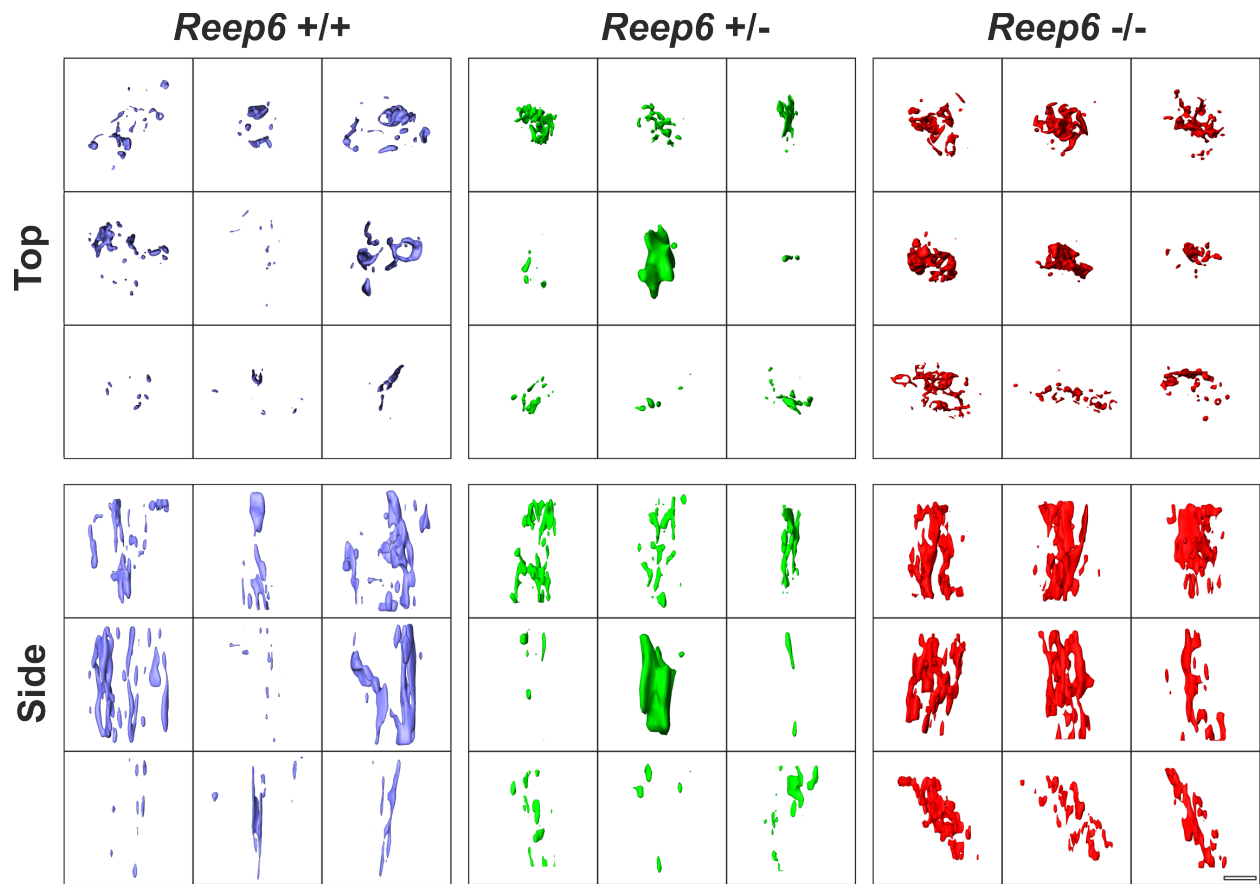

**Supplemental material Fig. 2** Models of distal inner segment (IS) ER generated from the serial block-face SEM data of nine *Reep6*<sup>+/+</sup>, *Reep6*<sup>+/-</sup> and *Reep6*<sup>-/-</sup> photoreceptors at P20. Top view and corresponding side view of models used to calculate the volume of distal IS ER. Scale bar= 200nm

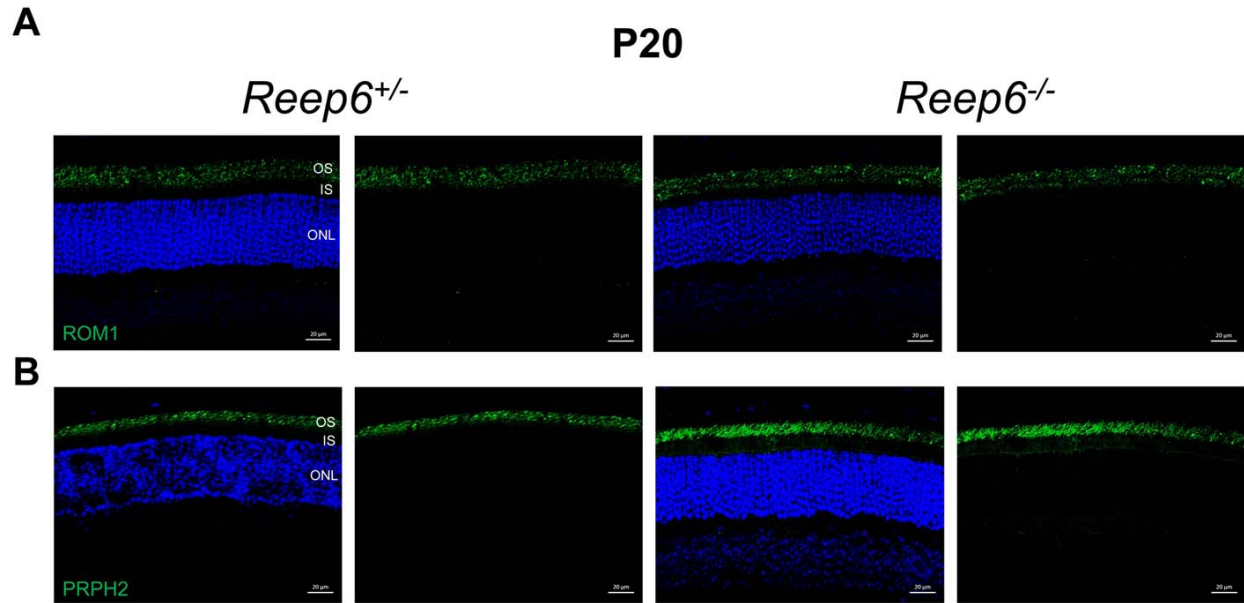

**Supplemental material Fig. 3** Trafficking of ROM1 and PRPH2 is unaffected in *Reep6* KO mice at P20. **(A)** Localization of retinal outer segment membrane protein 1 (ROM1), shown in green, is not affected in *Reep6*<sup>-/-</sup> retina at P20. **(B)** Localization of disk morphogenesis protein, peripherin 2 (also known as RDS), is not affected in *Reep6*<sup>-/-</sup> retina at P20. Nuclei are counter-stained with DAPI (blue). Scale bar= **(A, B)** 20 μm.
